# Supplementary material
Source: publisher site journal article supplement (https://www.spandidos-publications.com/2289/downloadSupplementary)
Supplement: Supplementary file 1 [file downloadSupplementary]

## Sheet: Sheet1
Table SI. Top differentially expressed genes in lung cancer tissues compared with that in normal tissues.
Gene symbol	logFC	Regulation	Adjusted P-value
SPP1	4.5	upregulated	1.55x10-26
COL10A1	4.26	upregulated	3.70x10-28
COL11A1	3.98	upregulated	1.55x10-18
COL10A1	3.8	upregulated	1.27x10-30
EZH2	2.2	upregulated	7.43x10-10
HS6ST2	3.43	upregulated	2.12x10-20
HS6ST2	3.39	upregulated	3.37x10-20
SPINK1	3.34	upregulated	1.89x10-11
COL11A1	3.32	upregulated	6.68x10-18
TOX3	3.2	upregulated	5.81x10-20
CTHRC1	3.19	upregulated	2.40x10-24
MMP12	3.18	upregulated	2.42x10-24
TOX3	3.11	upregulated	2.13x10-19
MMP1	3.04	upregulated	1.25x10-10
GREM1	3.03	upregulated	2.91x10-13
COL1A1	3	upregulated	1.64x10-18
CST1	2.99	upregulated	6.93x10-20
TOX3	2.75	upregulated	1.43x10-18
GREM1	2.71	upregulated	6.22x10-12
TOP2A	2.64	upregulated	5.36x10-20
CEACAM5	2.59	upregulated	3.26x10-09
PROM2	2.59	upregulated	1.03x10-24
GJB2	2.57	upregulated	2.67x10-15
AFAP1_AS1	2.5	upregulated	4.44x10-18
ANLN	2.49	upregulated	2.69x10-16
GCNT3	2.47	upregulated	4.25x10-22
CXCL14	2.43	upregulated	2.24x10-12
CDCA7	2.39	upregulated	1.73x10-17
CXCL14	2.38	upregulated	1.92x10-11
CP	2.37	upregulated	4.12x10-10
CP	2.37	upregulated	1.21x10-10
TMPRSS4	2.32	upregulated	8.74x10-17
CRABP2	2.3	upregulated	7.44x10-19
PSAT1	2.29	upregulated	5.79x10-19
MMP11	2.28	upregulated	3.61x10-17
XDH	2.27	upregulated	6.33x10-18
COL1A1	2.26	upregulated	4.29x10-19
LINC00511	2.25	upregulated	1.48x10-22
TOP2A	2.25	upregulated	1.40x10-15
CP	2.24	upregulated	9.78x10-12
COMP	2.2	upregulated	1.25x10-16
GLB1L3	2.18	upregulated	4.05x10-10
CXCL13	2.14	upregulated	1.03x10-6
SULF1	2.14	upregulated	6.04x10-16
LGSN	2.13	upregulated	1.53x10-12
ABCC3	2.13	upregulated	4.25x10-21
THBS2	2.13	upregulated	1.25x10-16
KIF26B	2.1	upregulated	5.11x10-19
CP	2.08	upregulated	2.87x10-8
GOLM1	2.07	upregulated	7.18x10-31
KIAA0101	2.07	upregulated	1.51x10-19
SIX1	2.06	upregulated	1.48x10-11
ST6GALNAC1	2.04	upregulated	1.18x10-14
MMRN1	-2	downregulated	1.69x10-11
KCNK3	-2	downregulated	1.27x10-24
THBD	-2	downregulated	1.43x10-18
SLIT2	-2.01	downregulated	1.35x10-15
RXFP1	-2.01	downregulated	1.72x10-24
CYP4B1	-2.01	downregulated	4.68x10-13
RAMP3	-2.01	downregulated	9.71x10-22
SOCS2	-2.01	downregulated	2.38x10-16
FOXF1	-2.01	downregulated	3.01x10-21
FIBIN	-2.01	downregulated	4.39x10-20
KANK3	-2.01	downregulated	1.68x10-30
STXBP6	-2.02	downregulated	1.02x10-18
KIAA1462	-2.02	downregulated	2.15x10-16
DACH1	-2.02	downregulated	3.66x10-17
HBEGF	-2.02	downregulated	2.18x10-16
PCOLCE2	-2.02	downregulated	6.88x10-14
MFAP4	-2.02	downregulated	3.69x10-17
GNLY	-2.02	downregulated	1.78x10-16
FIBIN	-2.04	downregulated	3.78x10-16
CALCRL	-2.04	downregulated	1.22x10-08
IL33	-2.04	downregulated	1.51x10-12
AKAP12	-2.04	downregulated	1.09x10-14
SCEL	-2.04	downregulated	6.33x10-10
ADAMTS1	-2.04	downregulated	2.44x10-14
S100A8	-2.04	downregulated	6.79x10-10
ACADL	-2.05	downregulated	5.96x10-18
ACADL	-2.05	downregulated	1.33x10-20
RGCC	-2.05	downregulated	3.21x10-22
PLAC9	-2.07	downregulated	5.35x10-23
AKAP2	-2.08	downregulated	8.04x10-23
LOC101927458	-2.08	downregulated	4.82x10-18
MS4A15	-2.08	downregulated	2.24x10-13
SGCG	-2.08	downregulated	1.05x10-30
HCAR3	-2.09	downregulated	3.31x10-14
ABI3BP	-2.09	downregulated	1.25x10-16
SCEL	-2.1	downregulated	8.54x10-11
AGTR1	-2.1	downregulated	6.38x10-17
LRRK2	-2.1	downregulated	8.48x10-11
ARHGAP6	-2.1	downregulated	2.16x10-20
HBA1	-2.11	downregulated	1.78x10-15
LRRN3	-2.11	downregulated	2.12x10-20
GPM6B	-2.11	downregulated	4.24x10-16
CLDN5	-2.11	downregulated	3.91x10-22
TGFBR3	-2.11	downregulated	1.83x10-17
SFTPD	-2.13	downregulated	1.26x10-08
PIP5K1B	-2.13	downregulated	9.02x10-17
STXBP6	-2.14	downregulated	1.42x10-22
RHOJ	-2.14	downregulated	3.97x10-19
CFD	-2.14	downregulated	6.43x10-19
LDB2	-2.14	downregulated	5.21x10-22
ADAMTSL3	-2.15	downregulated	6.51x10-19
SCARA5	-2.15	downregulated	2.72x10-14
TGFBR3	-2.16	downregulated	3.81x10-16
CALCRL	-2.16	downregulated	1.88x10-19
KCNT2	-2.16	downregulated	1.04x10-22
SNTN	-2.17	downregulated	9.11x10-10
ZBTB16	-2.17	downregulated	6.72x10-9
CXCL2	-2.17	downregulated	8.97x10-13
KIAA1462	-2.18	downregulated	2.42x10-23
ACKR1	-2.18	downregulated	6.89x10-13
OGN	-2.19	downregulated	3.91x10-11
MME	-2.19	downregulated	4.30x10-28
GPM6B	-2.2	downregulated	1.33x10-17
JAM2	-2.2	downregulated	1.79x10-19
CDH5	-2.2	downregulated	1.29x10-24
GIMAP8	-2.2	downregulated	4.38x10-22
SCN7A	-2.21	downregulated	6.14x10-12
CAV1	-2.21	downregulated	2.32x10-20
TAL1	-2.21	downregulated	4.01x10-25
ADAMTS8	-2.22	downregulated	1.73x10-21
EMCN	-2.22	downregulated	9.29x10-22
ARHGEF26	-2.22	downregulated	2.25x10-24
ST6GALNAC5	-2.23	downregulated	1.61x10-18
LIN7A	-2.23	downregulated	2.79x10-25
ADH1B	-2.23	downregulated	1.02x10-19
DACH1	-2.24	downregulated	1.01x10-18
GNG11	-2.24	downregulated	8.96x10-25
CD300LG	-2.27	downregulated	1.57x10-21
LRRN3	-2.27	downregulated	1.23x10-18
KL	-2.27	downregulated	5.69x10-24
AFF3	-2.27	downregulated	2.23x10-16
PEBP4	-2.27	downregulated	2.12x10-13
GPIHBP1	-2.29	downregulated	6.65x10-27
FRMD3	-2.29	downregulated	4.09x10-22
C2orf40	-2.29	downregulated	7.03x10-14
DEFA1	-2.29	downregulated	1.01x10-14
KLF4	-2.29	downregulated	9.87x10-17
LYVE1	-2.3	downregulated	3.47x10-23
EMCN	-2.3	downregulated	1.74x10-16
CHRDL1	-2.3	downregulated	6.89x10-13
MYZAP	-2.31	downregulated	6.65x10-25
HBB	-2.31	downregulated	1.23x10-14
ANKRD29	-2.31	downregulated	4.48x10-22
CLIC5	-2.31	downregulated	5.74x10-21
COL6A6	-2.31	downregulated	1.21x10-17
AQP4	-2.32	downregulated	9.73x10-08
KLF4	-2.32	downregulated	8.12x10-15
CDO1	-2.32	downregulated	1.01x10-17
SOCS2	-2.33	downregulated	1.88x10-10
LINC00968	-2.33	downregulated	1.83x10-23
CCBE1	-2.33	downregulated	2.15x10-29
CAV2	-2.34	downregulated	1.45x10-17
ZBED2	-2.34	downregulated	4.55x10-20
AKAP12	-2.34	downregulated	1.18x10-13
FILIP1	-2.34	downregulated	1.89x10-18
HHIP	-2.34	downregulated	5.56x10-14
FHL1	-2.35	downregulated	1.55x10-19
AQP4	-2.37	downregulated	6.30x10-14
ROBO4	-2.39	downregulated	3.38x10-27
FMO2	-2.4	downregulated	8.03x10-17
CXCR2	-2.4	downregulated	8.44x10-14
HBA1	-2.4	downregulated	1.17x10-16
MME	-2.4	downregulated	4.24x10-18
ARHGEF26	-2.4	downregulated	1.55x10-21
HBA1	-2.41	downregulated	4.57x10-17
HBA1	-2.41	downregulated	5.70x10-17
KAL1	-2.42	downregulated	6.93x10-20
PPBP	-2.43	downregulated	3.57x10-11
FILIP1	-2.44	downregulated	3.36x10-20
SLC6A4	-2.44	downregulated	1.70x10-17
SFTPC	-2.46	downregulated	3.58x10-10
HBA1	-2.46	downregulated	1.90x10-16
BCHE	-2.46	downregulated	1.28x10-12
FHL1	-2.47	downregulated	2.19x10-15
SPOCK2	-2.47	downregulated	5.57x10-34
SOX7	-2.47	downregulated	5.46x10-17
HBB	-2.47	downregulated	3.35x10-16
FHL1	-2.48	downregulated	2.16x10-16
FHL1	-2.48	downregulated	8.01x10-16
CA4	-2.5	downregulated	9.29x10-32
MAMDC2	-2.51	downregulated	1.12x10-12
SPTBN1	-2.51	downregulated	6.23x10-36
SDPR	-2.51	downregulated	8.89x10-15
FGFBP2	-2.52	downregulated	6.56x10-17
GRK5	-2.52	downregulated	1.06x10-29
ANKRD29	-2.52	downregulated	7.18x10-22
LYVE1	-2.53	downregulated	3.39x10-17
INMT	-2.53	downregulated	3.83x10-18
PTPRB	-2.54	downregulated	4.81x10-21
FMO2	-2.54	downregulated	4.25x10-22
AQP4	-2.55	downregulated	3.42x10-11
HBA1	-2.56	downregulated	1.33x10-16
ADIRF	-2.57	downregulated	1.15x10-23
AQP4	-2.57	downregulated	1.07x10-13
CCDC85A	-2.58	downregulated	1.18x10-26
SLC6A4	-2.59	downregulated	9.08x10-18
HBB	-2.6	downregulated	3.98x10-15
TEK	-2.6	downregulated	2.85x10-24
FAM150B	-2.62	downregulated	6.88x10-17
TCF21	-2.62	downregulated	1.61x10-21
CD36	-2.63	downregulated	2.13x10-17
KCNK3	-2.64	downregulated	1.63x10-19
FAM107A	-2.65	downregulated	1.18x10-25
CD36	-2.65	downregulated	4.38x10-16
S100A12	-2.65	downregulated	3.33x10-11
CAV1	-2.65	downregulated	1.46x10-22
CLIC5	-2.66	downregulated	4.30x10-19
FOSB	-2.69	downregulated	1.53x10-12
STX11	-2.69	downregulated	3.75x10-25
MCEMP1	-2.71	downregulated	5.18x10-19
SERTM1	-2.72	downregulated	8.13x10-28
PDK4	-2.73	downregulated	9.10x10-13
CLDN18	-2.74	downregulated	3.64x10-13
SOX7	-2.75	downregulated	1.17x10-18
EDNRB	-2.77	downregulated	1.18x10-25
UPK3B	-2.78	downregulated	4.10x10-19
CPB2	-2.8	downregulated	1.44x10-12
ABCA8	-2.81	downregulated	2.32x10-16
IL6	-2.84	downregulated	3.34x10-12
IGSF10	-2.86	downregulated	1.42x10-26
FIGF	-2.86	downregulated	1.35x10-20
IL1RL1	-2.87	downregulated	9.28x10-12
CLEC3B	-2.88	downregulated	2.47x10-27
SDPR	-2.89	downregulated	1.49x10-21
CLDN18	-2.9	downregulated	3.11x10-15
BTNL9	-2.92	downregulated	2.79x10-24
EMCN	-2.92	downregulated	2.22x10-24
EDNRB	-2.93	downregulated	4.25x10-22
FHL1	-2.96	downregulated	2.49x10-18
AQP4	-3.04	downregulated	1.21x10-10
NCKAP5	-3.11	downregulated	2.66x10-32
MT1M	-3.12	downregulated	2.52x10-15
TNNC1	-3.12	downregulated	3.87x10-27
EDNRB	-3.19	downregulated	6.92x10-22
SFTPA1	-3.2	downregulated	6.70x10-10
ADRB1	-3.21	downregulated	1.25x10-17
CLDN18	-3.23	downregulated	3.43x10-18
GKN2	-3.25	downregulated	4.11x10-17
SFTPC	-3.27	downregulated	1.04x10-17
SFTPC	-3.29	downregulated	2.07x10-12
ADH1B	-3.34	downregulated	1.09x10-14
SFTPC	-3.34	downregulated	6.04x10-13
SFTPC	-3.36	downregulated	1.24x10-12
ADH1B	-3.36	downregulated	1.28x10-15
CD36	-3.37	downregulated	3.58x10-20
SCGB1A1	-3.38	downregulated	8.25x10-10
SOSTDC1	-3.39	downregulated	6.92x10-18
FCN3	-3.41	downregulated	3.01x10-20
RTKN2	-3.41	downregulated	8.87x10-33
FAM107A	-3.44	downregulated	6.01x10-25
CLIC5	-3.46	downregulated	1.92x10-22
AGER	-3.46	downregulated	6.23x10-36
TMEM100	-3.57	downregulated	8.54x10-18
SLC6A4	-3.59	downregulated	1.79x10-19
GPM6A	-3.62	downregulated	4.16x10-28
STXBP6	-3.63	downregulated	2.51x10-22
FABP4	-3.75	downregulated	3.04x10-22
WIF1	-3.77	downregulated	1.73x10-14
CA4	-3.87	downregulated	4.14x10-31
CLDN18	-4.16	downregulated	2.88x10-16
GPM6A	-4.2	downregulated	3.52x10-29
AGER	-4.4	downregulated	1.15x10-28
FC, fold change.
